# Supplementary material for: Morphology control of SAPO-34 and its catalytic performance for methanol to olefin reaction
Source: Royal Society of Chemistry journal article supplement (doi:10.1039/d2nj00336h), 2022-01-01
Supplement: d2nj00336h1.pdf [file d2nj00336h1.pdf]

## **Supplementary Information**

### **Morphology control of SAPO-34 and their catalytic performances for methanol to olefins reaction**

*Lei Guo<sup>\*</sup>, Weiping Zhu, Aihua Xing, Fei Li, Zhihui, Guo*

*National Institute of Clean and Low Carbon Energy, Beijing 102211, China*

*Journal: New Journal of Chemistry*

*4 pages, 2 Figures*

## Table of Contents

|                                                      |        |
|------------------------------------------------------|--------|
| Fig. S1 SEM images of sample S-0.3, S-0.4 and S-0.6. | Page 3 |
| Fig. S2 BJH pore size distribution of samples.       | Page 4 |

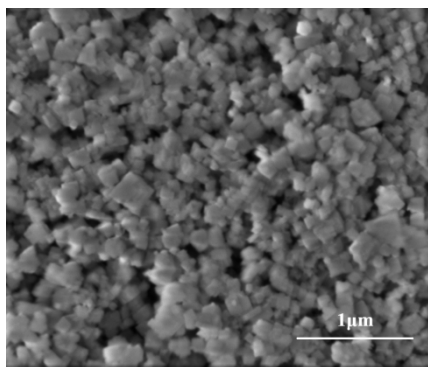

S-0.3

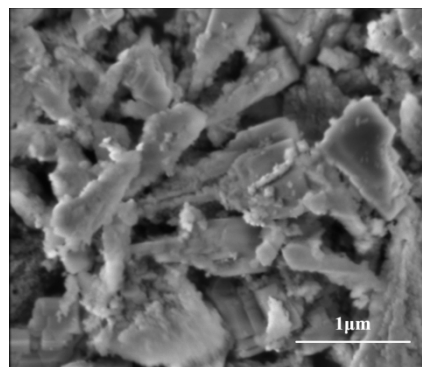

S-0.4

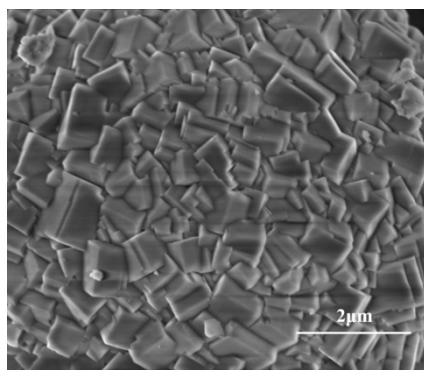

S-0.6

Fig. S1 SEM images of sample S-0.3, S-0.4 and S-0.6.

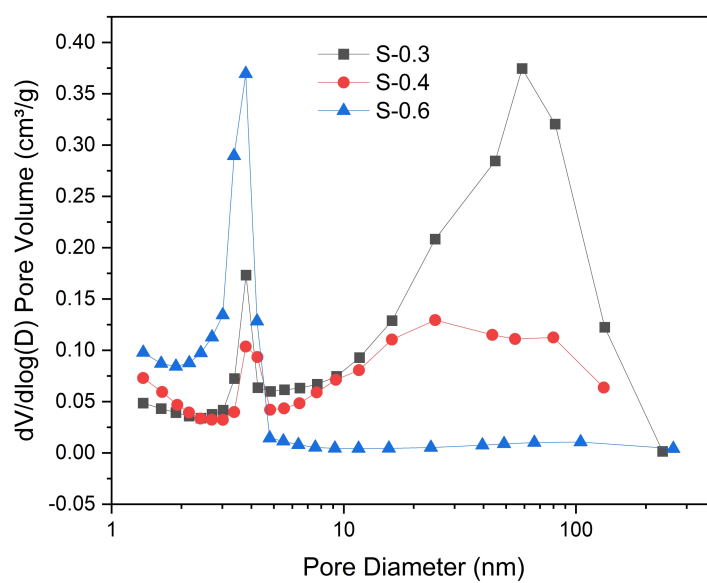

Fig. S2 BJH pore size distribution of samples.
